# Supplementary material
Source: PubMed Central journal article supplement (PMC4260818)
Supplement: NIHMS635582-supplement-VIPS_Arteriopathy_Article_Supplemental_Material.pdf [file NIHMS635582-supplement-VIPS_Arteriopathy_Article_Supplemental_Material.pdf]

SUPPLEMENTAL MATERIAL

**Supplemental Table I.** Demographics and clinical characteristics of 355 childhood arterial ischemic stroke cases, stratified by primary arteriopathy diagnosis

| Characteristic                   | Definite<br>Arteriopathy<br>N=127 |             | Possible<br>Arteriopathy<br>N=34 |             | No<br>Arteriopathy<br>N=194 |             | P-value* |
|----------------------------------|-----------------------------------|-------------|----------------------------------|-------------|-----------------------------|-------------|----------|
|                                  | n                                 | (%)         | n                                | (%)         | n                           | (%)         |          |
| <b>Demographics</b>              |                                   |             |                                  |             |                             |             |          |
| Age in years, median (IQR)       | 7.4                               | (3.7, 11.9) | 9.1                              | (4.3, 15.7) | 8.3                         | (2.1, 14.8) | 0.31**   |
| Male gender                      | 68                                | 53.5        | 22                               | 64.7        | 109                         | 56.2        | 0.51     |
| Race                             |                                   |             |                                  |             |                             |             | 0.39     |
| White                            | 77                                | (60.6)      | 20                               | (58.8)      | 133                         | (68.6)      |          |
| Black                            | 15                                | (11.8)      | 6                                | (17.6)      | 18                          | (9.3)       |          |
| Indian/South Asian               | 15                                | (11.8)      | 2                                | (5.9)       | 9                           | (4.6)       |          |
| East Asian                       | 4                                 | (3.1)       | 1                                | (2.9)       | 4                           | (2.1)       |          |
| First Nations/Aboriginal         | 2                                 | (1.6)       | 0                                | (0)         | 2                           | (1.0)       |          |
| Middle Eastern                   | 0                                 | (0)         | 0                                | (0)         | 3                           | (1.5)       |          |
| Pacific Islander                 | 0                                 | (0)         | 0                                | (0)         | 1                           | (0.5)       |          |
| Mixed or other                   | 11                                | (8.7)       | 4                                | (11.8)      | 23                          | (11.9)      |          |
| Unknown                          | 3                                 | (2.4)       | 1                                | (2.9)       | 1                           | (0.5)       |          |
| Ethnicity                        |                                   |             |                                  |             |                             |             | 0.07     |
| Non-Hispanic                     | 110                               | (86.6)      | 30                               | (88.2)      | 149                         | (76.8)      |          |
| Hispanic                         | 10                                | (7.9)       | 2                                | (5.9)       | 35                          | (18.0)      |          |
| Mixed or other                   | 7                                 | (5.5)       | 2                                | (5.9)       | 10                          | (5.2)       |          |
| Country                          |                                   |             |                                  |             |                             |             | 0.05     |
| USA                              | 77                                | (60.6)      | 22                               | (64.7)      | 124                         | (63.9)      |          |
| Canada                           | 23                                | (18.1)      | 5                                | (14.7)      | 32                          | (16.5)      |          |
| Australia                        | 8                                 | (6.3)       | 2                                | (5.9)       | 6                           | (3.1)       |          |
| Philippines                      | 11                                | (8.7)       | 1                                | (2.9)       | 4                           | (2.1)       |          |
| Chile                            | 2                                 | (1.6)       | 0                                | (0)         | 12                          | (6.2)       |          |
| United Kingdom                   | 2                                 | (1.6)       | 1                                | (2.9)       | 8                           | (4.1)       |          |
| France                           | 4                                 | (3.1)       | 1                                | (2.9)       | 1                           | (0.5)       |          |
| Serbia                           | 0                                 | (0)         | 1                                | (2.9)       | 4                           | (2.1)       |          |
| China                            | 0                                 | (0)         | 1                                | (2.9)       | 3                           | (1.5)       |          |
| <b>Stroke presentation</b>       |                                   |             |                                  |             |                             |             |          |
| Focal signs                      |                                   |             |                                  |             |                             |             |          |
| Hemiparesis                      | 104                               | (81.9)      | 25                               | (73.5)      | 156                         | (80.4)      | 0.55     |
| Dysarthria                       | 33                                | (26.0)      | 12                               | (35.3)      | 52                          | (26.8)      | 0.54     |
| Aphasia                          | 35                                | (27.6)      | 5                                | (14.7)      | 39                          | (20.1)      | 0.16     |
| Ataxia                           | 27                                | (21.3)      | 13                               | (38.2)      | 31                          | (16.0)      | 0.004    |
| Visual field deficit             | 15                                | (11.8)      | 7                                | (20.6)      | 24                          | (12.4)      | 0.38     |
| Non-focal signs                  |                                   |             |                                  |             |                             |             |          |
| Headache                         | 48                                | (37.8)      | 15                               | (44.1)      | 63                          | (32.5)      | 0.50     |
| Decreased level of consciousness | 37                                | (29.1)      | 12                               | (35.3)      | 53                          | (27.3)      | 0.83     |

|                                                                |           |          |           |          |
|----------------------------------------------------------------|-----------|----------|-----------|----------|
| Nausea/vomiting                                                | 31 (24.4) | 9 (26.5) | 45 (23.2) | 0.96     |
| Seizures at presentation                                       | 32 (25.2) | 6 (17.6) | 46 (23.7) | 0.02     |
| Vertigo                                                        | 13 (10.2) | 5 (14.7) | 22 (11.3) | 0.93     |
| Diplopia                                                       | 2 (1.6)   | 2 (5.9)  | 8 (4.1)   | 0.66     |
| Papilledema                                                    | 3 (2.4)   | 0 (0)    | 1 (0.5)   | 0.55     |
| <b>Risk factors or co-morbidities (not mutually exclusive)</b> |           |          |           |          |
| Cardiac disease                                                | 14 (11.0) | 8 (23.5) | 85 (43.8) | <0.0001  |
| Congenital heart disease                                       | 6 (4.7)   | 2 (5.9)  | 56 (28.9) | <0.0001* |
| Acquired heart disease                                         | 0 (0)     | 1 (2.9)  | 20 (10.3) | <0.0001* |
| Isolated patent foramen ovale                                  | 6 (4.7)   | 4 (11.8) | 11 (5.7)  | 0.28*    |
| Stroke at cardiac surgery (<72 hours)                          | 1 (0.8)   | 0 (0)    | 9 (4.6)   | 0.10*    |
| Other cardiac disease                                          | 5 (3.9)   | 4 (11.8) | 32 (16.5) | 0.001*   |
| Other chronic disorders                                        |           |          |           |          |
| Sickle cell anemia                                             | 9 (7.1)   | 0 (0)    | 4 (2.1)   | 0.05*    |
| Downs syndrome                                                 | 7 (5.5)   | 2 (5.9)  | 2 (1.0)   | 0.03*    |
| Other genetic syndrome                                         | 5 (3.9)   | 1 (2.9)  | 10 (5.2)  | 0.93     |
| Migraine                                                       | 5 (3.9)   | 0 (0)    | 7 (3.6)   | 0.75*    |
| Prothrombotic state                                            | 2 (1.6)   | 0 (0)    | 8 (4.1)   | 0.38*    |
| Oral contraceptives***                                         | 3 (5.1)   | 2 (16.7) | 5 (5.9)   | 0.28*    |
| Indwelling catheter                                            | 1 (0.8)   | 0 (0)    | 8 (4.1)   | 0.15*    |
| Iron deficiency anemia                                         | 4 (3.1)   | 1 (2.9)  | 1 (0.5)   | 0.09*    |
| Brain tumor                                                    | 4 (3.1)   | 0 (0)    | 1 (0.5)   | 0.17*    |
| Benign                                                         | 2 (1.6)   | 0 (0)    | 0 (0)     | 0.31*    |
| Malignant                                                      | 2 (1.6)   | 0 (0)    | 1 (0.5)   | 0.68*    |
| Aneurysm                                                       | 1 (0.8)   | 0 (0)    | 2 (1.0)   | 1.00*    |
| PHACES syndrome/hemangioma                                     | 2 (1.6)   | 0 (0)    | 1 (0.5)   | 0.68*    |
| Hematologic malignancy                                         | 0 (0)     | 0 (0)    | 2 (1.0)   | 0.61     |
| L-asparaginase therapy                                         | 0         | 0 (0)    | 2 (1.0)   | 0.61*    |
| Connective tissue disease                                      | 1 (0.8)   | 1 (2.9)  | 0 (0)     | 0.08*    |
| Ventriculoperitoneal shunt                                     | 1 (0.8)   | 0 (0)    | 0 (0)     | 0.45*    |
| Acute systemic illness by chart review                         |           |          |           |          |
| Fever lasting >48 hours                                        | 18 (14.2) | 2 (5.9)  | 24 (12.4) | 0.47*    |
| Systemic sepsis or bacteremia                                  | 9 (7.1)   | 2 (5.9)  | 9 (4.6)   | 0.65*    |
| Dehydration                                                    | 6 (4.7)   | 1 (2.9)  | 11 (5.7)  | 0.94*    |
| Shock                                                          | 0 (0)     | 1 (2.9)  | 8 (4.1)   | 0.04*    |
| Viral gastroenteritis                                          | 0 (0)     | 0 (0)    | 2 (1.0)   | 0.61*    |

\*P-value calculated using Fishers exact test (indicated by \*); otherwise, chi-square tests were used

\*\* Kruskal-Wallis test

\*\*\*females only: N=59 (definite), 12 (possible), 85 (no arteriopathy)

**Supplemental Table II.** Imaging modality and timing of vascular imaging in 355 childhood arterial ischemic stroke cases, stratified by primary arteriopathy diagnosis

|                                                  | <b>Total<br/>N=355<br/>n (%)</b> | <b>Definite<br/>Arteriopathy<br/>n %</b> | <b>Possible<br/>Arteriopathy<br/>n %</b> | <b>No<br/>Arteriopathy<br/>n %</b> | <b>P-value</b> |
|--------------------------------------------------|----------------------------------|------------------------------------------|------------------------------------------|------------------------------------|----------------|
| <b>Imaging modality at baseline</b>              |                                  |                                          |                                          |                                    |                |
| Brain parenchyma                                 |                                  |                                          |                                          |                                    | 0.47           |
| MRI only                                         | 216 (60.8)                       | 72 (56.7)                                | 20 (58.8)                                | 124 (63.9)                         |                |
| CT only                                          | 5 (1.4)                          | 1 (0.8)                                  | 1 (2.9)                                  | 3 (1.5)                            |                |
| MRI and CT                                       | 134 (37.7)                       | 54 (42.5)                                | 13 (38.2)                                | 67 (34.5)                          |                |
| Intracranial vascular imaging                    |                                  |                                          |                                          |                                    |                |
| MRA brain                                        | 323 (91.0)                       | 116 (91.3)                               | 30 (88.2)                                | 177 (91.2)                         | 0.76*          |
| CTA brain                                        | 84 (23.7)                        | 34 (26.8)                                | 10 (29.4)                                | 38 (19.6)                          | 0.22           |
| Conventional angiography, brain                  | 51 (14.4)                        | 28 (22.0)                                | 8 (23.5)                                 | 15 (7.7)                           | 0.0005         |
| Cervical vascular imaging                        | 187 (52.7)                       | 63 (49.6)                                | 22 (64.7)                                | 103 (53.1)                         | 0.29           |
| MRA neck                                         | 154 (43.4)                       | 49 (38.6)                                | 17 (50.0)                                | 88 (45.4)                          | 0.35           |
| CTA neck                                         | 45 (12.7)                        | 17 (13.4)                                | 7 (20.6)                                 | 21 (10.8)                          | 0.28           |
| Conventional angiography, neck                   | 14 (3.9)                         | 6 (4.7)                                  | 3 (8.8)                                  | 5 (2.6)                            | 0.13*          |
| <b>Follow-up vascular imaging (any modality)</b> |                                  |                                          |                                          |                                    |                |
| At least one follow-up study                     | 147 (41.4)                       | 68 (53.5)                                | 15 (44.1)                                | 64 (33.0)                          | 0.001          |
| >1 follow-up study                               | 68 (19.2)                        | 39 (30.7)                                | 6 (17.6)                                 | 23 (11.9)                          | <0.0001        |
| <b>Time to vascular imaging, days</b>            |                                  |                                          |                                          |                                    |                |
| Stroke to baseline imaging, median (IQR)         | 1 (0, 2)                         | 1 (0, 2)                                 | 1 (0, 2)                                 | 1 (0, 2)                           | 0.81**         |
| Stroke to 1st follow-up, median (IQR) (n=147)    | 79 (18, 128)                     | 39 (12, 111)                             | 70 (24, 105)                             | 99 (44, 155)                       | 0.002**        |
| Stroke to last follow-up, median (IQR) (n=68)    | 277 (172, 408)                   | 257 (106, 397)                           | 212 (172, 355)                           | 372 (219, 448)                     | 0.15**         |

\* Fisher's exact

\*\*Kruskal-Wallis
